# Supplementary material
Source: MDPI journal article supplement (https://www.mdpi.com/2073-4395/7/3/55)
Supplement: s1 [file s1]

Table S1. Main management and agronomic characteristics of the studied sites

| Location | Type of fertilizer | Rate of input application | Crops/trees grown | Notable practice | Years  of  farming | Farm size (ha) |
| --- | --- | --- | --- | --- | --- | --- |
| Fallow  (Ref-DF) | NA | NA | NA | NA | 10-year  fallow land | 1.3 |
| Agroforestry  (Ref-GS) | NA | NA | *Cassia siamea*  Teak (*Tectona grandis*)  Mahogany (*Khaya spp*.) | No burning | 5 | 1.0 |
| Inorganic  (In-DF) | NPK15:15:15,  SOA | S1: 90 kg N ha-1  S2: 75 kg N ha-1  S3: 90 kg N ha-1 | Okra (*Abelmoschus spp*.)  Cabbage (*Brassica oleracea*)  Garden egg (*Solanum spp*.)  Pepper (*Capsicum spp.*) | All 3 sites are rain fed with two cultivations in a year | 10 | 0.6 |
| Combine  (Co-DF) | NPK15:15:15,  Urea, Leaf litter mulching,  Chicken droppings | S1: 60 kg N ha-1  S2: 60 kg N/ha  S3: 60 kg N ha-1 | Pepper (*Capsicum spp.*)  Garden egg (*Solanum spp*.)  Maize (*Zea mays*) | S1: No burning  S2: Burning  S3: No burning | 12 | 1.3 |
| Inorganic  (In-GS) | NPK 23:10:15, SOA | 75 kg N ha-1 | Maize (*Zea mays*) | All 3 sites are burnt annually | 20 | 0.9 |
| Combine  (Co-GS) | Rice straw, cattle manure, NPK, kitchen waste, NPK 23:10:15, SOA | S1: 30 kg N ha-1  S2: 30 kg N ha-1  S3: 30 kg N ha-1 | Maize (*Zea mays*) | All 3 sites are burnt annually | 35 | 0.8 |
| Organic  (Or-GS) | Cattle and sheep  Droppings, maize straw | S1 & S2: 600 kg/ acre  S3: 800 kg/ acre | Maize (*Zea mays*) | S1: No burning  S2: Burning  S3: No burning | 20 | 1.6 |
| No fertilization  (No-GS) | NA | NA | Soybean (*Glycine max*) Groundnut (*Arachis hypogaea*)  Maize (*Zea mays*) | All 3 sites are burnt annually | 9 | 0.2 |

NA, applicable; SOA, Sulphate of Ammonia; DF; Deciduous forest, GS; Guinea savannah, Ref; reference, In; inorganic, Co; Organic and inorganic, Or; organic and No; no fertilization, S1, S2 and S3; site 1-3 respectively.
